# Supplementary material for: Wireframe DNA Origami for the Cellular Delivery of Platinum(II)-Based Drugs
Source: MDPI journal article supplement (doi:10.3390/ijms242316715), 2023-11-24
Supplement: s1 [file s1]

## Supplementary Information

### Wireframe DNA origami for the cellular delivery of platinum(II)-based drugs

Erik De Luca<sup>1</sup>, Yang Wang<sup>2</sup>, Igor Baars<sup>2</sup>, Federica De Castro<sup>1</sup>, Marco Lolaico<sup>2</sup>, Danilo Migoni<sup>1</sup>, Cosimo Ducani<sup>2</sup>, Michele Benedetti<sup>1</sup>, Björn Högberg<sup>2</sup>, Francesco Paolo Fanizzi<sup>1,\*</sup>

<sup>1</sup> Dipartimento di Scienze e Tecnologie Biologiche ed Ambientali, Università del Salento, Lecce, Italy.

<sup>2</sup> Division of Medical Systems Bioengineering, Department of Medical Biochemistry and Biophysics, Karolinska Institutet, Solna, Sweden.

\* Corresponding author.

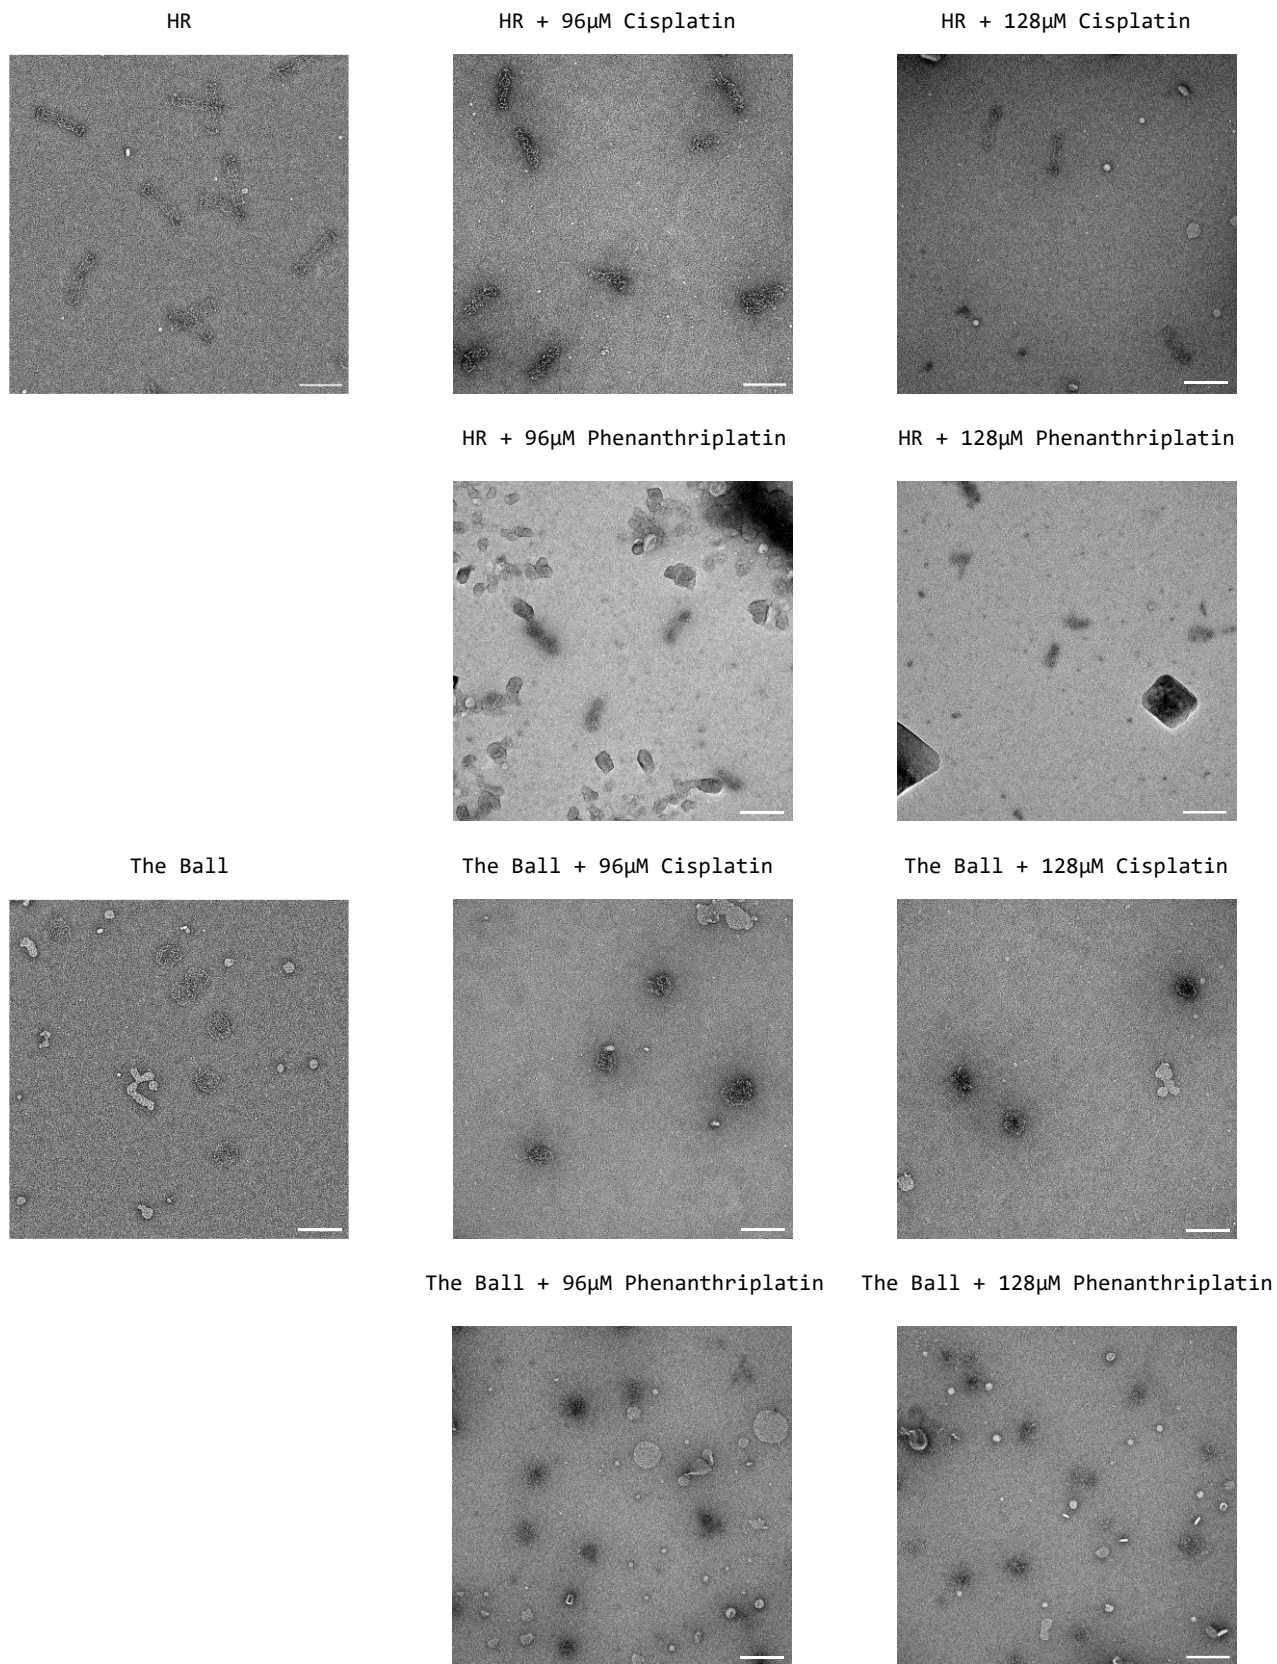

**Figure S1.** Negative staining TEM of the HR and Ball, comparison with the same structures folded with 96 and 128  $\mu$ M of cisplatin and phenanthriplatin. Scale bars are 100nm.

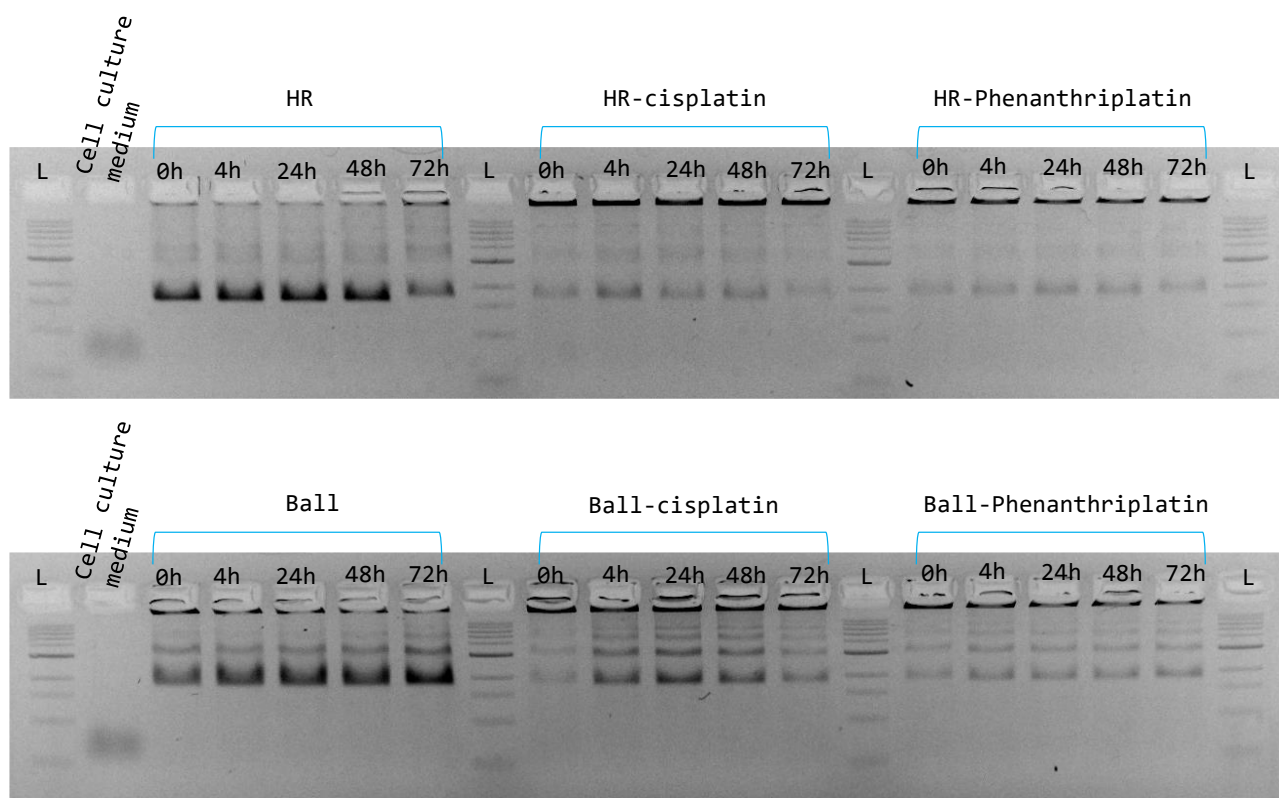

**Figure S2.** Agarose gel representing the stability of HR and the Ball structures to cell culture media, DMEM containing 10% heat-inactivated fetal bovine serum (FBS). The samples were incubated from 0 to 72 hours at 37°C and then immediately loaded in a 2% agarose gel supplemented with 10 mM MgCl<sub>2</sub> and run for 3 hours at 90 V.

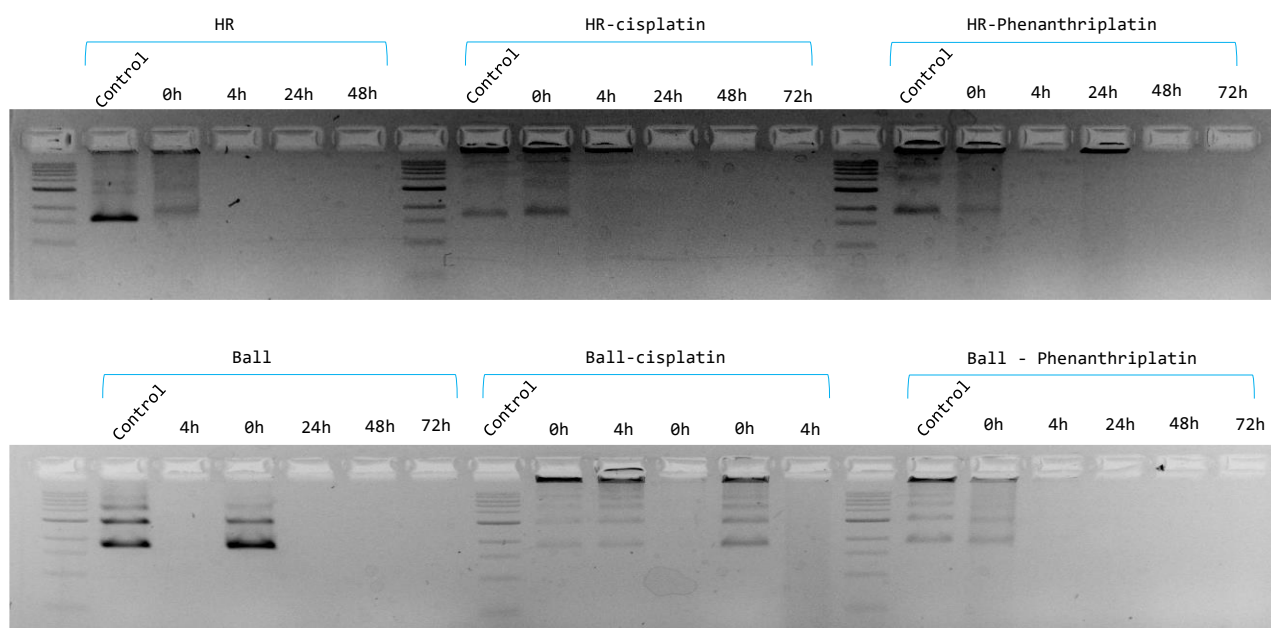

**Figure S3.** Agarose gel representing the stability of HR and the Ball structures to DNase I. The structures were washed into 1x PBS supplemented with 2.5 mM  $MgCl_2$  and 0.1 mM  $CaCl_2$ . DNase I (New England Biolabs) was diluted in the same buffer and added at a concentration of 0.36 U/ml. The samples were incubated from 0 to 72 hours at 37°C and then immediately loaded in a 2% agarose gel supplemented with 10 mM  $MgCl_2$  and run for 3 hours at 90 V.

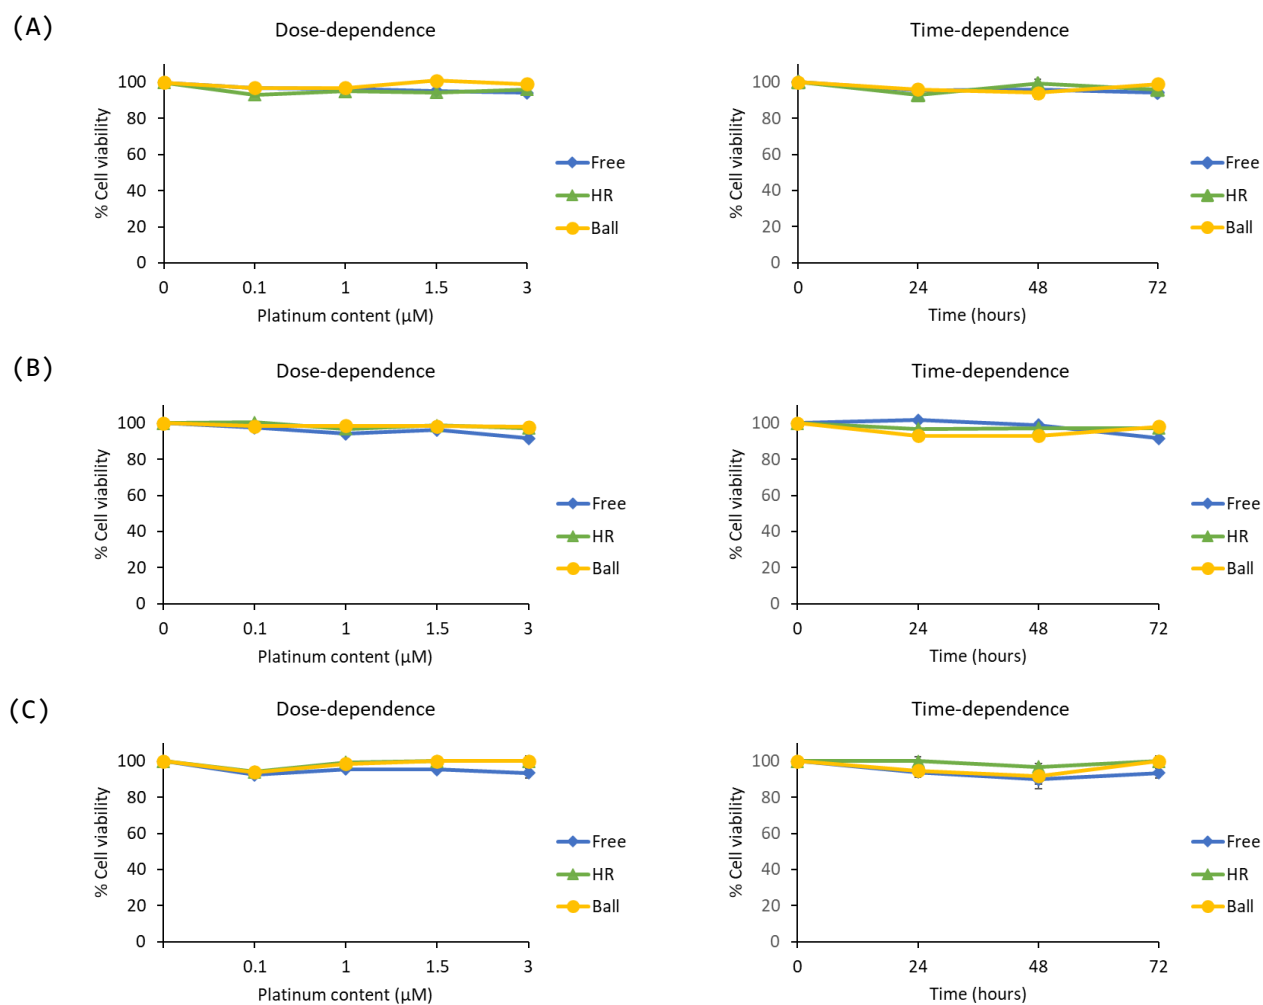

**Figure S4.** Left panel dose-dependence at 72 hours. Right panel time-dependence at 3  $\mu\text{M}$  of cisplatin loaded nanostructures. A) A549, lung adenocarcinoma cells. B) HeLa, cervical adenocarcinoma cells. C) MCF-7, breast adenocarcinoma cells.
